# Supplementary material for: Interface segregation of iron sintering aid in gadolinium-doped ceria
Source: Royal Society of Chemistry journal article supplement (doi:10.1039/d3ce00852e), 2023-01-01
Supplement: d3ce00852e1.pdf [file d3ce00852e1.pdf]

### Supplementary Information

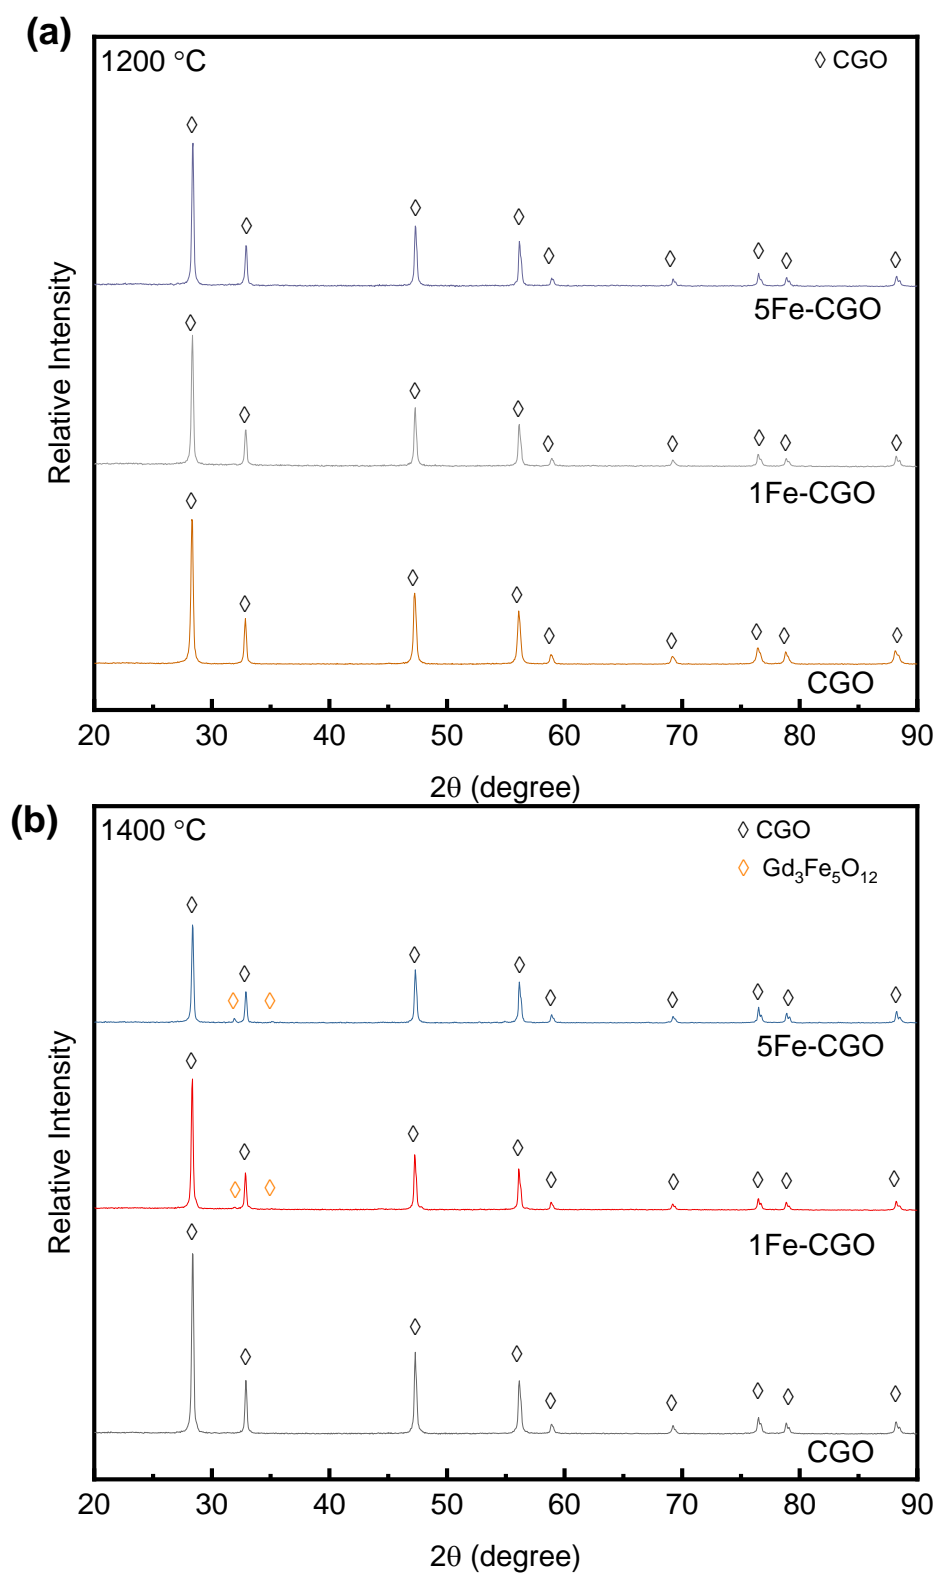

**Fig. S1.** X-ray diffraction patterns of CGO and Fe-doped CGO submitted to (a) 1200 °C and (b) 1400 °C.
